# Supplementary material for: Genetic and Antigenic Evolution of European Swine Influenza A Viruses of HA-1C (Avian-Like) and HA-1B (Human-Like) Lineages in France from 2000 to 2018
Source: MDPI journal article supplement (doi:10.3390/v12111304), 2020-11-13
Supplement: s1 [file s1]

**Table S1. Genbank accession numbers for swIAV sequences isolated in France and used in this study**

| Strain name                          | Collection date | Subtype             | HA clade (subgroup) | PB2      | PB1      | PA       | HA       | NP       | NA       | M        | NS       | References           |
|--------------------------------------|-----------------|---------------------|---------------------|----------|----------|----------|----------|----------|----------|----------|----------|----------------------|
| A/swine/Marseille/2260/1980          | 1980            | H1 <sub>av</sub> N1 | 1C.1                | KJ889313 | KJ889314 | KJ889315 | KJ889316 | KJ889317 | KJ889318 | KJ889319 | KJ889320 | Krumbholz et al 2014 |
| A/swine/Finnistere/2899/1982         | 1982            | H1 <sub>av</sub> N1 | 1C.1                | AJ311457 | AJ311462 | AJ311463 | CY116348 | CY116349 | CY116350 | CY116351 | CY116352 | Lycett et al 2012    |
| A/swine/France/WVL3/1984             | 1984            | H1 <sub>av</sub> N1 | 1C.1                | CY037972 | CY037973 | CY037974 | CY037975 | CY037976 | CY037977 | CY037978 | CY037979 | Dunham et al 2009    |
| A/swine/France/WVL4/1985             | 1985            | H1 <sub>av</sub> N1 | 1C.1                | CY037980 | CY037981 | CY037982 | CY037983 | CY037984 | CY037985 | CY037986 | CY037987 | Dunham et al 2009    |
| A/swine/France/WVL8/1992             | 1992            | H1 <sub>av</sub> N1 | 1C.1                | CY038012 | CY038013 | CY038014 | CY038015 | CY038016 | CY038017 | CY038018 | CY038019 | Dunham et al 2009    |
| A/swine/OMS/2111/1995                | 1995            | H1 <sub>av</sub> N1 | 1C.1-2-like         | CY116393 | CY116394 | CY116395 | CY116396 | CY116397 | CY116398 | CY116399 | CY116400 | Lycett et al 2012    |
| A/swine/France/WVL13/1995            | 1995            | H1 <sub>av</sub> N1 | 1C.1-2-like         | CY037926 | CY037927 | CY037928 | CY037929 | CY037930 | CY037931 | CY037932 | CY037933 | Dunham et al 2009    |
| A/swine/OMS/2112/1995                | 1995            | H1 <sub>av</sub> N1 | 1C.1-2-like         | CY116401 | CY116402 | CY116403 | CY116404 | CY116405 | CY116406 | CY116407 | CY116408 | Lycett et al 2012    |
| A/swine/Cotes d'Armor/790/97         | 1997            | H1 <sub>hu</sub> N2 | 1B.1.2.3            | AJ306845 | AJ306865 | AJ311207 | AJ344007 | AJ307065 | AJ412705 | AJ316049 | AJ344026 | Marozin et al 2002   |
| A/swine/Cotes d'Armor/2433/98        | 1998            | H1 <sub>hu</sub> N2 | 1B.1.2.3            | -na-     | AJ306864 | AJ311205 | AJ412710 | AJ307066 | AJ412704 | -na-     | AJ344031 | Marozin et al 2002   |
| A/swine/Cotes d'Armor/1482/99        | 1999            | H1 <sub>av</sub> N1 | 1C.1-2-like         | -na-     | -na-     | -na-     | AJ412711 | -na-     | AJ410883 | -na-     | -na-     | Marozin et al 2002   |
| A/swine/Ille et Vilaine/1455/1999    | 1999            | H1 <sub>av</sub> N1 | 1C.2.3              | CY116377 | CY116378 | CY116379 | CY116380 | CY116381 | CY116382 | CY116383 | CY116384 | Lycett et al 2012    |
| A/swine/Cotes d'Armor/1488/99        | 1999            | H1 <sub>av</sub> N1 | 1C.2.3              | AJ306848 | AJ306856 | AJ311208 | AJ412712 | AJ307069 | AJ410881 | -na-     | AJ344027 | Marozin et al 2002   |
| A/swine/Cotes d'Armor/1515/99        | 1999            | H1 <sub>av</sub> N1 | 1C.1-2-like         | -na-     | -na-     | -na-     | AJ344002 | -na-     | AJ410884 | -na-     | -na-     | Marozin et al 2002   |
| A/swine/Cotes d'Armor/604/99         | 1999            | H1 <sub>hu</sub> N2 | 1B.1.1              | AJ306850 | AJ306863 | AJ312838 | AJ412709 | AJ307074 | AJ412702 | AJ316051 | AJ316062 | Marozin et al 2002   |
| A/swine/Cotes d'Armor/1121/00        | 2000            | H1 <sub>av</sub> N1 | 1C.2.3              | -na-     | -na-     | -na-     | AJ412708 | -na-     | AJ410875 | -na-     | -na-     | Marozin et al 2002   |
| A/swine/Cotes d'Armor/799/00         | 2000            | H1 <sub>hu</sub> N2 | 1B.1.2.3            | -na-     | -na-     | -na-     | AJ344006 | -na-     | AJ412694 | -na-     | -na-     | Marozin et al 2002   |
| A/swine/Cotes d'Armor/800/00         | 2000            | H1 <sub>hu</sub> N2 | 1B.1.2.3            | AJ306841 | AJ306859 | AJ312837 | AJ344005 | AJ307061 | AJ412695 | AJ316050 | AJ344039 | Marozin et al 2002   |
| A/swine/Cotes d'Armor/98574/2001     | 2001            | H1 <sub>hu</sub> N1 | 1B.1.1              | -na-     | -na-     | -na-     | AM503897 | -na-     | AM503897 | -na-     | -na-     | Franck et al 2007    |
| A/swine/Cotes d'Armor/60293/2001     | 2001            | H1 <sub>hu</sub> N1 | 1B.1.1              | -na-     | -na-     | -na-     | AM503896 | -na-     | AM777826 | -na-     | -na-     | Franck et al 2007    |
| A/swine/Cotes d'Armor/1624/2002      | 2002            | H1 <sub>av</sub> N1 | 1C.2.3              | CY116385 | CY116386 | CY116387 | CY116388 | CY116389 | CY116390 | CY116391 | CY116392 | Lycett et al 2012    |
| A/swine/Cotes d'Armor/1190/2002      | 2002            | H1 <sub>hu</sub> N2 | 1B.1.2.3            | -na-     | -na-     | -na-     | CY116372 | -na-     | CY116374 | CY116375 | -na-     | Lycett et al 2012    |
| A/swine/Cotes d'Armor/43394/2002     | 2002            | H1 <sub>hu</sub> N2 | 1B.1.2.3            | -na-     | -na-     | -na-     | AM503899 | -na-     | AM777822 | -na-     | -na-     | This study           |
| A/swine/Finnistere/800/2004          | 2004            | H1 <sub>av</sub> N1 | 1C.2.3              | CY116353 | CY116354 | CY116355 | CY116356 | CY116357 | CY116358 | CY116359 | CY116360 | Lycett et al 2012    |
| A/swine/Cotes d'Armor/016007/2005    | 2005-07-12      | H1 <sub>hu</sub> N1 | 1B.1.1              | -na-     | -na-     | -na-     | AM777810 | -na-     | AM777830 | -na-     | -na-     | This study           |
| A/swine/Cotes d'Armor/0227/2005      | 2005-10-17      | H1 <sub>av</sub> N1 | 1C.2.1              | -na-     | -na-     | -na-     | AM490221 | -na-     | AM777828 | -na-     | -na-     | This study           |
| A/swine/France/CotesdArmor-0113/2006 | 2006-04-25      | H1 <sub>hu</sub> N2 | 1B.1.2.3 (D)        | KR701501 | KR701502 | KR701503 | AM503902 | KR701504 | KR701505 | KR701506 | KR701507 | Watson et al 2015    |
| A/swine/Cotes d'Armor/0136_18/2006   | 2006-05-09      | H1 <sub>av</sub> N1 | 1C.2.1              | -na-     | -na-     | -na-     | AM490223 | -na-     | AM777827 | -na-     | -na-     | This study           |
| A/swine/Cotes d'Armor/0136_17/2006   | 2006-05-09      | H1 <sub>hu</sub> N2 | 1B.1.2.3            | -na-     | -na-     | -na-     | AM490224 | -na-     | AM777821 | -na-     | -na-     | This study           |
| A/swine/Cotes d'Armor/0123/2006      | 2006-05-12      | H1 <sub>hu</sub> N2 | 1B.1.2.3 (D)        | -na-     | -na-     | -na-     | AM503901 | -na-     | AM777820 | -na-     | -na-     | This study           |

|                                          |            |                     |              |          |          |          |          |          |          |          |          |                   |
|------------------------------------------|------------|---------------------|--------------|----------|----------|----------|----------|----------|----------|----------|----------|-------------------|
| A/swine/France/Cotes d'Armor-0190/2006   | 2006-08-01 | H1 <sub>hu</sub> N1 | 1B.1.2.3 *   | MT379427 | MT379428 | MT379429 | MT379430 | MT379431 | MT379432 | MT379433 | MT379434 | This study        |
| A/swine/France/Cotes d'Armor-0214/2006   | 2006-09-01 | H1 <sub>hu</sub> N2 | 1B.1.1       | MT394946 | MT394947 | MT394948 | MT394949 | MT394950 | MT394951 | MT394952 | MT394953 | This study        |
| A/swine/Cotes d'Armor/002007/2006        | 2006-12-22 | H1 <sub>av</sub> N1 | 1C.2.1       | -na-     | -na-     | -na-     | AM778090 | -na-     | AM777829 | -na-     | -na-     | This study        |
| A/swine/France/CotesdArmor-0041/2011     | 2007-02-01 | H1 <sub>hu</sub> N2 | 1B.1.2.3     | KR700213 | KR700214 | KR700215 | KR700216 | KR700217 | KR700218 | KR700219 | KR700220 | Watson et al 2015 |
| A/swine/Cotes d'Armor/0040/2007          | 2007-02-01 | H1 <sub>hu</sub> N2 | 1B.1.2.3 (D) | -na-     | -na-     | -na-     | AM503547 | -na-     | AM777817 | -na-     | -na-     | This study        |
| A/swine/Morbihan/0028/2007               | 2007-02-05 | H1 <sub>hu</sub> N2 | 1B.1.2.3 (D) | -na-     | -na-     | -na-     | AM777813 | -na-     | AM777816 | -na-     | -na-     | This study        |
| A/swine/Cotes d'Armor/0111/2007          | 2007-03-01 | H1 <sub>hu</sub> N2 | 1B.1.2.3     | -na-     | -na-     | -na-     | AM777814 | -na-     | AM777819 | -na-     | -na-     | This study        |
| A/swine/Finistere/0045/2008              | 2008-02-12 | H1 <sub>hu</sub> N2 | 1B.1.2.3     | -na-     | -na-     | -na-     | FN646097 | -na-     | FN646092 | -na-     | -na-     | This study        |
| A/swine/Cotes d'Armor/0102/2008          | 2008-04-08 | H1 <sub>av</sub> N2 | 1C.2.1       | -na-     | -na-     | -na-     | FN646098 | -na-     | FN646095 | -na-     | -na-     | This study        |
| A/swine/Cotes d'Armor/0158/2008          | 2008-05-19 | H1 <sub>av</sub> N1 | 1C.2.1       | -na-     | -na-     | -na-     | FN646101 | -na-     | FN646096 | -na-     | -na-     | This study        |
| A/swine/Cotes d'Armor/1174/2009          | 2009       | H1 <sub>hu</sub> N2 | 1B.1.2.3     | CY116364 | CY116365 | CY116366 | CY116367 | CY116368 | CY116369 | CY116370 | CY116371 | Lycett et al 2012 |
| A/swine/Finistere/0028/2009              | 2009-02-04 | H1 <sub>av</sub> N1 | 1C.2.1       | -na-     | -na-     | -na-     | HE577046 | -na-     | FR878010 | -na-     | -na-     | This study        |
| A/swine/Cotes d'Armor/0388/2009          | 2009-07-28 | H1 <sub>av</sub> N1 | 1C.2.1       | KR701495 | KR701496 | KR701497 | KC881265 | KR701498 | FR871194 | KR701499 | KR701500 | Watson et al 2015 |
| A/swine/Aisne/0054/2010                  | 2010       | H1 <sub>av</sub> N1 | 1C.2.1       | -na-     | -na-     | -na-     | CY110764 | -na-     | CY110765 | -na-     | -na-     | This study        |
| A/swine/France/Cotes d'Armor-0070/2010   | 2010-03-19 | H1 <sub>hu</sub> N1 | 1B.1.2.3     | MT379419 | MT379420 | MT379421 | MT379422 | MT379423 | MT379424 | MT379425 | MT379426 | This study        |
| A/swine/Cotes d'Armor/0104/2010          | 2010-05-21 | H1 <sub>av</sub> N1 | 1C.2.1       | -na-     | -na-     | -na-     | CY110766 | -na-     | CY110767 | -na-     | -na-     | This study        |
| A/swine/Morbihan/0163/2010               | 2010-06-18 | H1 <sub>hu</sub> N1 | 1B.1.1       | -na-     | -na-     | -na-     | KC345638 | -na-     | KC345652 | -na-     | -na-     | This study        |
| A/swine/Finistere/0181/2010              | 2010-08-02 | H1 <sub>av</sub> N2 | 1C.2.1       | -na-     | -na-     | -na-     | KC345631 | -na-     | HE600192 | -na-     | -na-     | This study        |
| A/swine/Cotes d'Armor/0186/2010          | 2010-09-01 | H1 <sub>av</sub> N2 | 1C.2.1       | -na-     | -na-     | -na-     | CY115832 | -na-     | HE577045 | -na-     | -na-     | This study        |
| A/swine/Finistere/0188/2010              | 2010-09-02 | H1 <sub>av</sub> N1 | 1C.2.1       | -na-     | -na-     | -na-     | KC345632 | -na-     | HE600193 | -na-     | -na-     | This study        |
| A/swine/Ile et Vilaine/0225/2010         | 2010-09-30 | H1 <sub>hu</sub> N2 | 1B.1.2.3     | -na-     | -na-     | -na-     | KC345633 | -na-     | KC345634 | -na-     | -na-     | This study        |
| A/swine/France/CotesdArmor-0275/2010     | 2010-11-23 | H1 <sub>av</sub> N1 | 1C.2.1       | KR699731 | -na-     | KR699733 | KR699734 | KR699735 | KR699736 | KR699737 | KR699738 | Watson et al 2015 |
| A/swine/France/56-110525/2010            | 2010-11-26 | H1 <sub>hu</sub> N1 | 1B.1.2.3 (D) | KR700514 | KR700515 | KR700516 | KR700517 | KR700518 | KR700519 | KR700520 | KR700521 | Watson et al 2015 |
| A/swine/France/CotesdArmor-0023/2011     | 2011-01-01 | H1 <sub>av</sub> N1 | 1C.2.1       | KR700269 | -na-     | KR700270 | KR700271 | KR700272 | KR700273 | KR700274 | KR700275 | Watson et al 2015 |
| A/swine/France/CotesdArmor-0041/2011     | 2011-01-01 | H1 <sub>hu</sub> N2 | 1B.1.2.3 (D) | KR700213 | KR700214 | KR700215 | KR700216 | KR700217 | KR700218 | KR700219 | KR700220 | Watson et al 2015 |
| A/swine/France/Finistere-0011/2011       | 2011-01-11 | H1 <sub>av</sub> N1 | 1C.2.1       | KR699739 | KR699740 | KR699741 | KR699742 | KR699743 | KR699744 | KR699745 | KR699746 | Watson et al 2015 |
| A/swine/France/CotesdArmor-0025/2011     | 2011-01-20 | H1 <sub>hu</sub> N2 | 1B.1.2.3 (D) | KR700206 | MT394954 | KR700207 | KR700208 | KR700209 | KR700210 | KR700211 | KR700212 | Watson et al 2015 |
| A/swine/France/Ille et Vilaine-0115/2011 | 2011-02-01 | H1 <sub>av</sub> N1 | 1C.2.1       | MT394979 | MT394980 | MT394981 | MT394982 | MT394983 | MT394984 | MT394985 | MT394986 | This study        |
| A/swine/France/CotesdArmor-0105/2011     | 2011-02-01 | H1 <sub>hu</sub> N2 | 1B.1.2.3     | KR700221 | KR700222 | KR700223 | KR700224 | KR700225 | KR700226 | KR700227 | KR700228 | Watson et al 2015 |
| A/swine/France/CotesdArmor-0074/2011     | 2011-02-01 | H1 <sub>hu</sub> N2 | 1B.1.2.3 (D) | KR700237 | KR700238 | KR700239 | KR700240 | KR700241 | KR700242 | KR700243 | KR700244 | Watson et al 2015 |
| A/swine/France/22-110529/2011            | 2011-02-08 | H1 <sub>av</sub> N2 | 1C.2.1       | KR700323 | KR700324 | KR700325 | KR700326 | -na-     | KR700328 | KR700329 | KR700330 | Watson et al 2015 |
| A/swine/France/CotesdArmor-0147/2011     | 2011-04-05 | H1 <sub>av</sub> N1 | 1C.2.1       | KR700253 | KR700254 | KR700255 | KR700256 | KR700257 | KR700258 | KR700259 | KR700260 | Watson et al 2015 |
| A/swine/France/Ille et Vilaine-0187/2011 | 2011-04-07 | H1 <sub>av</sub> N1 | 1C.2.1       | KR699747 | KR699748 | KR699749 | KR699750 | KR699751 | KR699752 | KR699753 | KR699754 | Watson et al 2015 |
| A/swine/France/CotesdArmor-0198/2011     | 2011-04-11 | H1 <sub>hu</sub> N2 | 1B.1.2.3     | KR700190 | KR700191 | KR700192 | KR700193 | KR700194 | KR700195 | KR700196 | KR700197 | Watson et al 2015 |

|                                           |            |                     |              |          |          |          |          |          |          |          |          |                                             |
|-------------------------------------------|------------|---------------------|--------------|----------|----------|----------|----------|----------|----------|----------|----------|---------------------------------------------|
| A/swine/France/Finistere-0186/2011        | 2011-04-14 | H1 <sub>hu</sub> N2 | 1B.1.2.3     | MT394971 | MT394972 | MT394973 | MT394974 | MT394975 | MT394976 | MT394977 | MT394978 | This study                                  |
| A/swine/France/Morbihan-0213/2011         | 2011-04-18 | H1 <sub>av</sub> N2 | 1C.2.1       | KR699755 | KR699756 | KR699757 | KR699758 | KR699759 | KR699760 | KR699761 | KR699762 | Watson et al 2015                           |
| A/swine/France/Ille-et-Vilaine-0266/2011  | 2011-05-24 | H1 <sub>av</sub> N1 | 1C.2.1       | KR700229 | KR700230 | KR700231 | KR700232 | KR700233 | KR700234 | KR700235 | KR700236 | Watson et al 2015                           |
| A/swine/France/Morbihan-0285/2011         | 2011-05-30 | H1 <sub>av</sub> N1 | 1C.2.1       | KR700245 | KR700246 | KR700247 | KR700248 | KR700249 | KR700250 | KR700251 | KR700252 | Watson et al 2015                           |
| A/swine/France/Ille-et-Vilaine-0346/2011  | 2011-06-01 | H1 <sub>hu</sub> N2 | 1B.1.2.3 (D) | KR701483 | KR701484 | KR701485 | KC894804 | KR701486 | KC894807 | KR701487 | KR701488 | Watson et al 2015                           |
| A/swine/France/Cotes d'Armor-0295/2011    | 2011-06-06 | H1 <sub>hu</sub> N2 | 1B.1.2.3 (D) | MT394955 | MT394956 | MT394957 | MT394958 | MT394959 | MT394960 | MT394961 | MT394962 | This study                                  |
| A/swine/France/Cotes d'Armor-0282/2011    | 2011-06-06 | H1 <sub>av</sub> N1 | 1C.2.1       | KR699803 | KR699804 | KR699805 | KR699806 | KR699807 | MT394952 | KR699808 | KR699809 | Watson et al 2015                           |
| A/swine/France/Morbihan-0294/2011         | 2011-06-14 | H1 <sub>av</sub> N1 | 1C.2.1       | KR699763 | KR699764 | KR699765 | KR699766 | KR699767 | KR699768 | KR699769 | KR699770 | Watson et al 2015                           |
| A/swine/France/Vendee-0301/2011           | 2011-06-14 | H1 <sub>av</sub> N1 | 1C.2.1       | KR699771 | KR699772 | KR699773 | KR699774 | KR699775 | KR699776 | KR699777 | KR699778 | Watson et al 2015                           |
| A/swine/France/Cotes d'Armor-0292/2011    | 2011-06-15 | H1 <sub>av</sub> N1 | 1C.2.1       | KR700261 | KR700262 | KR700263 | KR700264 | KR700265 | KR700266 | KR700267 | KR700268 | Watson et al 2015                           |
| A/swine/France/29-110307/2011             | 2011-06-23 | H1 <sub>av</sub> N1 | 1C.2.1       | -na-     | -na-     | -na-     | KC894805 | -na-     | KC894808 | -na-     | -na-     | This study                                  |
| A/swine/France/Ille-et-Vilaine-0404/2011  | 2011-06-28 | H1 <sub>hu</sub> N2 | 1B.1.2.3     | KR700276 | KR700277 | KR700278 | KR700279 | KR700280 | KR700281 | KR700282 | KR700283 | Watson et al 2015                           |
| A/swine/France/Ille-et-Vilaine-0354/2011  | 2011-06-30 | H1 <sub>av</sub> N1 | 1C.2.1       | KR700198 | KR700199 | KR700200 | KR700201 | -na-     | KR700203 | KR700204 | KR700205 | Watson et al 2015                           |
| A/swine/France/Loire-Atlantique-0405/2011 | 2011-07-01 | H1 <sub>av</sub> N1 | 1C.2.1       | KR699779 | KR699780 | KR699781 | KR699782 | KR699783 | KR699784 | KR699785 | KR699786 | Watson et al 2015                           |
| A/swine/France/Cotes d'Armor-0364/2011    | 2011-07-05 | H1 <sub>av</sub> N1 | 1C.2.1       | KR700904 | -na-     | KR700905 | KR700906 | KR700907 | KR700908 | KR700909 | KR700910 | Watson et al 2015                           |
| A/swine/France/Ille-et-Vilaine-0415/2011  | 2011-08-01 | H1 <sub>hu</sub> N2 | 1B.1.2.3     | KR699787 | KR699788 | KR699789 | KR699790 | KR699791 | KR699792 | KR699793 | KR699794 | Watson et al 2015                           |
| A/swine/France/Cotes d'Armor-0455/2011    | 2011-09-05 | H1 <sub>av</sub> N1 | 1C.2.1       | MT394963 | MT394964 | MT394965 | MT394966 | MT394967 | MT394968 | MT394969 | MT394970 | This study                                  |
| A/swine/France/Cotes d'Armor-0558/2011    | 2011-09-14 | H1 <sub>hu</sub> N2 | 1B.1.2.3 (D) | KR700315 | KR700316 | KR700317 | KR700318 | KR700319 | KR700320 | KR700321 | KR700322 | Watson et al 2015                           |
| A/swine/France/Morbihan-0599/2011         | 2011-10-27 | H1 <sub>av</sub> N2 | 1C.2.1       | KR700292 | MT394953 | KR700293 | KR700294 | KR700295 | KR700296 | KR700297 | KR700298 | Watson et al 2015                           |
| A/swine/France/Ille-et-Vilaine-0648/2011  | 2011-11-07 | H1 <sub>hu</sub> N2 | 1B.1.2.3     | MT394987 | MT394988 | MT394989 | MT394990 | MT394991 | MT394992 | MT394993 | MT394994 | This study                                  |
| A/swine/France/Morbihan-0617/2011         | 2011-11-14 | H1 <sub>av</sub> N1 | 1C.2.1       | MT394940 | -na-     | MT394941 | MT394942 | MT394943 | -na-     | MT394944 | MT394945 | This study                                  |
| A/swine/France/41-120137/2012             | 2012-01-10 | H1 <sub>av</sub> N1 | 1C.2.1       | MT379003 | MT379004 | MT379005 | MT379006 | MT379007 | MT379008 | MT379009 | MT379010 | This study                                  |
| A/swine/France/35-120024/2012             | 2012-01-19 | H1 <sub>hu</sub> N2 | 1B.1.2.3     | KR700307 | KR700308 | KR700309 | KR700310 | KR700311 | KR700312 | KR700313 | KR700314 | Watson et al 2015                           |
| A/swine/France/22-120067/2012             | 2012-02-08 | H1 <sub>hu</sub> N1 | 1B.1.2.3 **  | KR700967 | KR700968 | KR700969 | KR700970 | KR700971 | KR700972 | KR700973 | KR700974 | Watson et al 2015                           |
| A/swine/France/29-120064/2012             | 2012-02-09 | H1 <sub>av</sub> N1 | 1C.2.1       | KR700284 | KR700285 | KR700286 | KR700287 | KR700288 | KR700289 | KR700290 | KR700291 | Watson et al 2015                           |
| A/swine/France/22-120146/2012             | 2012-04-17 | H1 <sub>av</sub> N1 | 1C.2.1       | KR700911 | KR700912 | KR700913 | KR700914 | KR700915 | KR700916 | KR700917 | KR700918 | Watson et al 2015                           |
| A/swine/France/56-120177/2012             | 2012-05-21 | H1 <sub>hu</sub> N2 | 1B.1.2.3     | KR701566 | KR701567 | KR701568 | KC295234 | KR701569 | KR701570 | KR701571 | KR701572 | Watson et al 2015                           |
| A/swine/France/22-120228/2012             | 2012-07-09 | H1 <sub>hu</sub> N2 | 1B.1.2.3     | KR700943 | KR700944 | KR700945 | KR700946 | KR700947 | KR700948 | KR700949 | KR700950 | Watson et al 2015                           |
| A/swine/France/29-120326/2012             | 2012-08-28 | H1 <sub>av</sub> N1 | 1C.2.1       | KR700935 | KR700936 | KR700937 | KR700938 | KR700939 | KR700940 | KR700941 | KR700942 | Watson et al 2015                           |
| A/swine/France/22-120340/2012             | 2012-10-09 | H1 <sub>av</sub> N1 | 1C.2.1       | KR700927 | KR700928 | KR700929 | KR700930 | KR700931 | KR700932 | KR700933 | KR700934 | Watson et al 2015                           |
| A/swine/France/50-120350/2012             | 2012-10-10 | H1 <sub>av</sub> N1 | 1C.2.1       | KR700919 | KR700920 | KR700921 | KR700922 | KR700923 | KR700924 | KR700925 | KR700926 | Watson et al 2015                           |
| A/swine/France/37-120345/2012             | 2012-10-18 | H1 <sub>av</sub> N2 | 1C.2.1       | KR700959 | KR700960 | KR700961 | KR700962 | KR700963 | KR700964 | KR700965 | KR700966 | Watson et al 2015;<br>Chastagner et al 2019 |
| A/swine/France/22-120421/2012             | 2012-11-27 | H1 <sub>av</sub> N1 | 1C.2.1       | -na-     | -na-     | -na-     | KM267920 | -na-     | KP822957 | -na-     | -na-     | This study                                  |

|                               |            |                     |                     |          |          |          |          |          |          |          |          |                       |
|-------------------------------|------------|---------------------|---------------------|----------|----------|----------|----------|----------|----------|----------|----------|-----------------------|
| A/swine/France/22-120460/2012 | 2012-12-19 | H1 <sub>av</sub> N1 | 1C.2.1              | -na-     | -na-     | -na-     | KM267921 | -na-     | KP822958 | -na-     | -na-     | This study            |
| A/swine/France/35-130023/2013 | 2013-01-02 | H1 <sub>hu</sub> N2 | 1B.1.2.3 (Δ146-147) | KR700983 | -na-     | KR700984 | KR700985 | KR700986 | KR700987 | KR700988 | KR700989 | Watson et al 2015     |
| A/swine/France/01-130054/2013 | 2013-01-22 | H1 <sub>av</sub> N1 | 1C.2.2              | KR700975 | KR700976 | KR700977 | KR700978 | KR700979 | KR700980 | KR700981 | KR700982 | Watson et al 2015     |
| A/swine/France/53-130065/2013 | 2013-01-23 | H1 <sub>av</sub> N1 | 1C.2.1              | MT394924 | MT394925 | MT394926 | MT394927 | MT394928 | MT394929 | MT394930 | MT394931 | This study            |
| A/swine/France/70-130144/2013 | 2013-03-27 | H1 <sub>av</sub> N1 | 1C.2.1              | MT379355 | MT379356 | MT379357 | MT379358 | MT379359 | MT379360 | MT379361 | MT379362 | This study            |
| A/swine/France/01-130145/2013 | 2013-04-09 | H1 <sub>av</sub> N1 | 1C.2.2              | MT378595 | MT378596 | MT378597 | MT378598 | MT378599 | MT378600 | MT378601 | MT378602 | This study            |
| A/swine/France/59-130174/2013 | 2013-04-15 | H1 <sub>av</sub> N1 | 1C.2.1              | MT379195 | MT379196 | MT379197 | MT379198 | MT379199 | MT379200 | MT379201 | MT379202 | This study            |
| A/swine/France/22-130212/2013 | 2013-06-05 | H1 <sub>hu</sub> N2 | 1B.1.2.3 (Δ146-147) | KM267908 | KM267909 | KM267910 | KJ128323 | KM267911 | KJ128301 | KM267912 | KM267913 | This study            |
| A/swine/France/50-130337/2013 | 2013-09-17 | H1 <sub>av</sub> N1 | 1C.2.1              | MT379043 | MT379044 | MT379045 | MT379046 | MT379047 | MT379048 | MT379049 | MT379050 | This study            |
| A/swine/France/29-130398/2013 | 2013-10-24 | H1 <sub>av</sub> N1 | 1C.2.1 (A)          | MT378571 | MT378572 | MT378573 | MT378574 | MT378575 | MT378576 | MT378577 | MT378578 | This study            |
| A/swine/France/64-130454/2013 | 2013-12-19 | H1 <sub>av</sub> N1 | 1C.2.1              | MT379323 | MT379324 | MT379325 | MT379326 | MT379327 | MT379328 | MT379329 | MT379330 | This study            |
| A/swine/France/01-140489/2014 | 2014       | H1 <sub>av</sub> N1 | 1C.2.1 (B)          | MT378563 | MT378564 | MT378565 | MT378566 | MT378567 | MT378568 | MT378569 | MT378570 | This study            |
| A/swine/France/35-140041/2014 | 2014-01-14 | H1 <sub>hu</sub> N2 | 1B.1.2.3 (Δ146-147) | -na-     | -na-     | -na-     | KM267933 | -na-     | KY241123 | -na-     | -na-     | This study            |
| A/swine/France/50-140056/2014 | 2014-01-27 | H1 <sub>hu</sub> N2 | 1B.1.2.3 (Δ146-147) | MT379051 | MT379052 | MT379053 | MT379054 | MT379055 | MT379056 | MT379057 | MT379058 | This study            |
| A/swine/France/50-140058/2014 | 2014-01-28 | H1 <sub>hu</sub> N2 | 1B.1.2.3 (Δ146-147) | -na-     | -na-     | -na-     | KY241126 | -na-     | KY241127 | -na-     | -na-     | This study            |
| A/swine/France/22-140062/2014 | 2014-02-04 | H1 <sub>hu</sub> N2 | 1B.1.2.3 (Δ146-147) | -na-     | -na-     | -na-     | KY241128 | -na-     | KY241129 | -na-     | -na-     | This study            |
| A/swine/France/22-140075/2014 | 2014-02-20 | H1 <sub>hu</sub> N2 | 1B.1.2.3 (Δ146-147) | -na-     | -na-     | -na-     | KY241130 | -na-     | KY241131 | -na-     | -na-     | This study            |
| A/swine/France/22-140102/2014 | 2014-02-28 | H1 <sub>hu</sub> N2 | 1B.1.2.3 (Δ146-147) | -na-     | -na-     | -na-     | KY241132 | -na-     | KY241133 | -na-     | -na-     | This study            |
| A/swine/France/79-140150/2014 | 2014-03-11 | H1 <sub>av</sub> N1 | 1C.2.1              | MT379387 | MT379388 | MT379389 | MT379390 | MT379391 | MT379392 | MT379393 | MT379394 | This study            |
| A/swine/France/29-140221/2014 | 2014-04-17 | H1 <sub>hu</sub> N2 | 1B.1.2.3 (Δ146-147) | -na-     | -na-     | -na-     | KY241134 | -na-     | KY241135 | -na-     | -na-     | This study            |
| A/swine/France/22-140256/2014 | 2014-05-07 | H1 <sub>hu</sub> N2 | 1B.1.2.3 (Δ146-147) | -na-     | -na-     | -na-     | KY241136 | -na-     | KY241137 | -na-     | -na-     | This study            |
| A/swine/France/61-140350/2014 | 2014-06-04 | H1 <sub>av</sub> N2 | 1C.2.1              | MT379291 | MT379292 | MT379293 | MT379294 | MT379295 | MT379296 | MT379297 | MT379298 | Chastagner et al 2019 |
| A/swine/France/29-140342/2014 | 2014-06-05 | H1 <sub>hu</sub> N2 | 1B.1.2.3            | MT378787 | MT378788 | MT378789 | MT378790 | MT378791 | MT378792 | MT378793 | MT378794 | This study            |
| A/swine/France/64-140385/2014 | 2014-07-07 | H1 <sub>av</sub> N1 | 1C.2.1              | MT379331 | MT379332 | MT379333 | MT379334 | MT379335 | MT379336 | MT379337 | MT379338 | This study            |
| A/swine/France/56-140486/2014 | 2014-11-24 | H1 <sub>hu</sub> N2 | 1B.1.2.3 (Δ146-147) | -na-     | -na-     | -na-     | KY241142 | -na-     | KY241143 | -na-     | -na-     | This study            |
| A/swine/France/22-140494/2014 | 2014-12-03 | H1 <sub>hu</sub> N2 | 1B.1.2.3 (Δ146-147) | -na-     | -na-     | -na-     | KY241144 | -na-     | KY241145 | -na-     | -na-     | This study            |
| A/swine/France/22-140496/2014 | 2014-12-08 | H1 <sub>hu</sub> N2 | 1B.1.2.3 (Δ146-147) | -na-     | -na-     | -na-     | KY241146 | -na-     | KY241147 | -na-     | -na-     | This study            |
| A/swine/France/22-140510/2014 | 2014-12-16 | H1 <sub>hu</sub> N2 | 1B.1.2.3 (Δ146-147) | -na-     | -na-     | -na-     | KY241148 | -na-     | KY241149 | -na-     | -na-     | This study            |
| A/swine/France/89-150069/2015 | 2015-02-09 | H1 <sub>av</sub> N1 | 1C.2.2              | MT379411 | MT379412 | MT379413 | MT379414 | MT379415 | MT379416 | MT379417 | MT379418 | This study            |
| A/swine/France/56-150097/2015 | 2015-03-04 | H1 <sub>hu</sub> N2 | 1B.1.2.3 (Δ146-147) | -na-     | -na-     | -na-     | KY241154 | -na-     | KU289597 | -na-     | -na-     | This study            |
| A/swine/France/64-150152/2015 | 2015-03-23 | H1 <sub>av</sub> N2 | 1C.2                | MT378579 | MT378580 | MT378581 | MT378582 | MT378583 | MT378584 | MT378585 | MT378586 | This study            |
| A/swine/France/44-150191/2015 | 2015-04-28 | H1 <sub>av</sub> N1 | 1C.2.1              | -na-     | -na-     | -na-     | KY241163 | -na-     | KU289594 | -na-     | -na-     | This study            |
| A/swine/France/05-150198/2015 | 2015-04-29 | H1 <sub>av</sub> N1 | 1C.2.1 (B)          | MT378627 | MT378628 | MT378629 | MT378630 | MT378631 | MT378632 | MT378633 | MT378634 | This study            |
| A/swine/France/61-150219/2015 | 2015-06-05 | H1 <sub>av</sub> N2 | 1C.2.1              | MT379299 | MT379300 | MT379301 | MT379302 | MT379303 | MT379304 | MT379305 | MT379306 | This study            |

|                               |            |                     |                     |          |          |          |          |          |          |          |          |                       |
|-------------------------------|------------|---------------------|---------------------|----------|----------|----------|----------|----------|----------|----------|----------|-----------------------|
| A/swine/France/65-150242/2015 | 2015-06-11 | H1 <sub>av</sub> N2 | 1C.2                | MT379339 | MT379340 | MT379341 | MT379342 | MT379343 | MT379344 | MT379345 | MT379346 | This study            |
| A/swine/France/22-150235/2015 | 2015-06-19 | H1 <sub>hu</sub> N2 | 1B.1.2.3 (Δ146-147) | -na-     | -na-     | -na-     | KY241155 | -na-     | KU289591 | -na-     | -na-     | This study            |
| A/swine/France/53-150263/2015 | 2015-07-10 | H1 <sub>av</sub> N1 | 1C.2.1 (A)          | -na-     | -na-     | -na-     | KY241166 | -na-     | KU289595 | -na-     | -na-     | This study            |
| A/swine/France/35-150267/2015 | 2015-07-16 | H1 <sub>av</sub> N1 | 1C.2.1 (A)          | -na-     | -na-     | -na-     | KY241167 | -na-     | KU289593 | -na-     | -na-     | This study            |
| A/swine/France/22-150284/2015 | 2015-08-10 | H1 <sub>hu</sub> N2 | 1B.1.2.3 (Δ146-147) | -na-     | -na-     | -na-     | KY241157 | -na-     | KY241158 | -na-     | -na-     | This study            |
| A/swine/France/56-150300/2015 | 2015-08-17 | H1 <sub>av</sub> N1 | 1C.2.1              | -na-     | -na-     | -na-     | KY241105 | -na-     | KY241106 | -na-     | -na-     | This study            |
| A/swine/France/62-150308/2015 | 2015-08-27 | H1 <sub>av</sub> N1 | 1C.2.1 (C)          | MT379307 | MT379308 | MT379309 | MT379310 | MT379311 | MT379312 | MT379313 | MT379314 | This study            |
| A/swine/France/53-150320/2015 | 2015-09-07 | H1 <sub>av</sub> N2 | 1C.2.1              | -na-     | -na-     | -na-     | KY241159 | -na-     | KU289596 | -na-     | -na-     | This study            |
| A/swine/France/72-150321/2015 | 2015-09-15 | H1 <sub>av</sub> N2 | 1C.2.1              | MT379363 | MT379364 | MT379365 | MT379366 | MT379367 | MT379368 | MT379369 | MT379370 | This study            |
| A/swine/France/29-150341/2015 | 2015-10-06 | H1 <sub>av</sub> N1 | 1C.2.1              | MT378795 | MT378796 | MT378797 | MT378798 | MT378799 | MT378800 | MT378801 | MT378802 | This study            |
| A/swine/France/22-150369/2015 | 2015-10-27 | H1 <sub>hu</sub> N2 | 1B.1.2.3            | -na-     | -na-     | -na-     | KY241108 | -na-     | KY241109 | -na-     | -na-     | This study            |
| A/swine/France/22-150368/2015 | 2015-10-28 | H1 <sub>av</sub> N1 | 1C.2.1 (A)          | -na-     | -na-     | -na-     | KY241095 | -na-     | KY241096 | -na-     | -na-     | This study            |
| A/swine/France/22-150384/2015 | 2015-11-02 | H1 <sub>hu</sub> N2 | 1B.1.2.3            | MT378659 | MT378660 | MT378661 | MT378662 | MT378663 | MT378664 | MT378665 | MT378666 | This study            |
| A/swine/France/29-150396/2015 | 2015-11-05 | H1 <sub>av</sub> N1 | 1C.2.1              | -na-     | -na-     | -na-     | KY241097 | -na-     | KY241098 | -na-     | -na-     | This study            |
| A/swine/France/35-150447/2015 | 2015-12-07 | H1 <sub>av</sub> N1 | 1C.2.1 (A)          | -na-     | -na-     | -na-     | KY241112 | -na-     | KY241113 | -na-     | -na-     | This study            |
| A/swine/France/22-160079/2016 | 2016-01-27 | H1 <sub>av</sub> N1 | 1C.2.1 (A)          | KY364117 | KY364118 | KY364119 | KY364120 | KY364121 | KY364122 | KY364123 | KY364124 | This study            |
| A/swine/France/29-160096/2016 | 2016-01-28 | H1 <sub>hu</sub> N2 | 1B.1.2.3            | KY364125 | KY364126 | KY364127 | KY364128 | KY364129 | KY364130 | KY364131 | KY364132 | This study            |
| A/swine/France/59-160078/2016 | 2016-01-28 | H1 <sub>av</sub> N2 | 1C.2.1 (C)          | -na-     | -na-     | -na-     | KY241161 | -na-     | KY241162 | -na-     | -na-     | This study            |
| A/swine/France/01-160099/2016 | 2016-02-03 | H1 <sub>av</sub> N1 | 1C.2.1 (B)          | KY364109 | KY364110 | KY364111 | KY364112 | KY364113 | KY364114 | KY364115 | KY364116 | This study            |
| A/swine/France/35-160126/2016 | 2016-02-25 | H1 <sub>av</sub> N1 | 1C.2.1              | KY364133 | KY364134 | KY364135 | KY364136 | KY364137 | KY364138 | KY364139 | KY364140 | This study            |
| A/swine/France/72-160154/2016 | 2016-03-24 | H1 <sub>av</sub> N1 | 1C.2.1 (A)          | KY364157 | KY364158 | KY364159 | KY364160 | KY364161 | KY364162 | KY364163 | KY364164 | This study            |
| A/swine/France/22-160150/2016 | 2016-03-24 | H1 <sub>hu</sub> N2 | 1B.1.2.3            | KY364149 | KY364150 | KY364151 | KY364152 | KY364153 | KY364154 | KY364155 | KY364156 | This study            |
| A/swine/France/37-160178/2016 | 2016-05-02 | H1 <sub>av</sub> N2 | 1C.2.1              | KY364173 | KY364174 | KY364175 | KY364176 | KY364177 | KY364178 | KY364179 | KY364180 | Chastagner et al 2019 |
| A/swine/France/35-160197/2016 | 2016-05-18 | H1 <sub>av</sub> N1 | 1C.2.1 (A)          | MT378931 | MT378932 | MT378933 | MT378934 | MT378935 | MT378936 | MT378937 | MT378938 | This study            |
| A/swine/France/35-160204/2016 | 2016-05-23 | H1 <sub>hu</sub> N2 | 1B.1.2.3 (Δ146-147) | MT378939 | MT378940 | MT378941 | MT378942 | MT378943 | MT378944 | MT378945 | MT378946 | This study            |
| A/swine/France/59-160211/2016 | 2016-05-26 | H1 <sub>hu</sub> N2 | 1B.1.2.1            | MT379203 | MT379204 | MT379205 | MT379206 | MT379207 | MT379208 | MT379209 | MT379210 | This study            |
| A/swine/France/29-160215/2016 | 2016-06-07 | H1 <sub>av</sub> N1 | 1C.2.1              | MT394932 | MT394933 | MT394934 | MT394935 | MT394936 | MT394937 | MT394938 | MT394939 | This study            |
| A/swine/France/62-160229/2016 | 2016-06-13 | H1 <sub>hu</sub> N2 | 1B.1.2.1            | MT379315 | MT379316 | MT379317 | MT379318 | MT379319 | MT379320 | MT379321 | MT379322 | This study            |
| A/swine/France/29-160250/2016 | 2016-06-23 | H1 <sub>av</sub> N1 | 1C.2.1 (A)          | MT378803 | MT378804 | MT378805 | MT378806 | MT378807 | MT378808 | MT378809 | MT378810 | This study            |
| A/swine/France/29-160311/2016 | 2016-09-01 | H1 <sub>av</sub> N1 | 1C.2.1              | MT378811 | MT378812 | MT378813 | MT378814 | MT378815 | MT378816 | MT378817 | MT378818 | This study            |
| A/swine/France/59-160320/2016 | 2016-09-19 | H1 <sub>hu</sub> N2 | 1B.1.2.1            | MT379211 | MT379212 | MT379213 | MT379214 | MT379215 | MT379216 | MT379217 | MT379218 | This study            |
| A/swine/France/69-160337/2016 | 2016-09-28 | H1 <sub>av</sub> N1 | 1C.2.1 (B)          | MT379347 | MT379348 | MT379349 | MT379350 | MT379351 | MT379352 | MT379353 | MT379354 | This study            |
| A/swine/France/29-160352/2016 | 2016-09-28 | H1 <sub>av</sub> N1 | 1C.2.1              | MT378819 | MT378820 | MT378821 | MT378822 | MT378823 | MT378824 | MT378825 | MT378826 | This study            |
| A/swine/France/50-160358/2016 | 2016-10-12 | H1 <sub>hu</sub> N2 | 1B.1.2.3 (Δ146-147) | MT379059 | MT379060 | MT379061 | MT379062 | MT379063 | MT379064 | MT379065 | MT379066 | This study            |

|                               |            |                     |                     |          |          |          |          |          |          |          |          |            |
|-------------------------------|------------|---------------------|---------------------|----------|----------|----------|----------|----------|----------|----------|----------|------------|
| A/swine/France/53-160350/2016 | 2016-10-12 | H1 <sub>av</sub> N1 | 1C.2.1 (A)          | MT379083 | MT379084 | MT379085 | MT379086 | MT379087 | MT379088 | MT379089 | MT379090 | This study |
| A/swine/France/29-160400/2016 | 2016-11-15 | H1 <sub>hu</sub> N2 | 1B.1.2.3            | MT378827 | MT378828 | MT378829 | MT378830 | MT378831 | MT378832 | MT378833 | MT378834 | This study |
| A/swine/France/35-160395/2016 | 2016-11-29 | H1 <sub>av</sub> N1 | 1C.2.1              | MT378947 | MT378948 | MT378949 | MT378950 | MT378951 | MT378952 | MT378953 | MT378954 | This study |
| A/swine/France/29-170332/2017 | 2017       | H1 <sub>hu</sub> N2 | 1B.1.2.3            | MT378891 | MT378892 | MT378893 | MT378894 | MT378895 | MT378896 | MT378897 | MT378898 | This study |
| A/swine/France/29-170039/2017 | 2017-01-19 | H1 <sub>hu</sub> N2 | 1B.1.2.3            | MT378835 | MT378836 | MT378837 | MT378838 | MT378839 | MT378840 | MT378841 | MT378842 | This study |
| A/swine/France/59-170028/2017 | 2017-01-20 | H1 <sub>av</sub> N1 | 1C.2.1 (C)          | MT379219 | MT379220 | MT379221 | MT379222 | MT379223 | MT379224 | MT379225 | MT379226 | This study |
| A/swine/France/22-170027/2017 | 2017-01-24 | H1 <sub>av</sub> N1 | 1C.2.1              | MT378667 | MT378668 | MT378669 | MT378670 | MT378671 | MT378672 | MT378673 | MT378674 | This study |
| A/swine/France/59-170058/2017 | 2017-02-13 | H1 <sub>hu</sub> N2 | 1B.1.2.1            | MT379227 | MT379228 | MT379229 | MT379230 | MT379231 | MT379232 | MT379233 | MT379234 | This study |
| A/swine/France/01-170070/2017 | 2017-02-27 | H1 <sub>av</sub> N1 | 1C.2.1 (B)          | MT378603 | MT378604 | MT378605 | MT378606 | MT378607 | MT378608 | MT378609 | MT378610 | This study |
| A/swine/France/56-170084/2017 | 2017-03-14 | H1 <sub>av</sub> N1 | 1C.2.1 (A)          | MT379107 | MT379108 | MT379109 | MT379110 | MT379111 | MT379112 | MT379113 | MT379114 | This study |
| A/swine/France/22-170089/2017 | 2017-03-22 | H1 <sub>av</sub> N1 | 1C.2.1 (A)          | MT378675 | MT378676 | MT378677 | MT378678 | MT378679 | MT378680 | MT378681 | MT378682 | This study |
| A/swine/France/29-170091/2017 | 2017-03-22 | H1 <sub>hu</sub> N2 | 1B.1.2.3            | MT378843 | MT378844 | MT378845 | MT378846 | MT378847 | MT378848 | MT378849 | MT378850 | This study |
| A/swine/France/29-170114/2017 | 2017-04-03 | H1 <sub>av</sub> N1 | 1C.2.1 (A)          | MT378851 | MT378852 | MT378853 | MT378854 | MT378855 | MT378856 | MT378857 | MT378858 | This study |
| A/swine/France/59-170121/2017 | 2017-04-25 | H1 <sub>av</sub> N1 | 1C.2.1 (C)          | MT379235 | MT379236 | MT379237 | MT379238 | MT379239 | MT379240 | MT379241 | MT379242 | This study |
| A/swine/France/53-170144/2017 | 2017-05-15 | H1 <sub>av</sub> N1 | 1C.2.1              | MT379091 | MT379092 | MT379093 | MT379094 | MT379095 | MT379096 | MT379097 | MT379098 | This study |
| A/swine/France/56-170149/2017 | 2017-05-22 | H1 <sub>av</sub> N1 | 1C.2.1 (A)          | MT379115 | MT379116 | MT379117 | MT379118 | MT379119 | MT379120 | MT379121 | MT379122 | This study |
| A/swine/France/56-170177/2017 | 2017-05-24 | H1 <sub>av</sub> N1 | 1C.2.1              | MT379131 | MT379132 | MT379133 | MT379134 | MT379135 | MT379136 | MT379137 | MT379138 | This study |
| A/swine/France/24-170162/2017 | 2017-06-01 | H1 <sub>av</sub> N1 | 1C.2.1 (A)          | MT378779 | MT378780 | MT378781 | MT378782 | MT378783 | MT378784 | MT378785 | MT378786 | This study |
| A/swine/France/56-170170/2017 | 2017-06-09 | H1 <sub>hu</sub> N2 | 1B.1.2.3 (Δ146-147) | MT379123 | MT379124 | MT379125 | MT379126 | MT379127 | MT379128 | MT379129 | MT379130 | This study |
| A/swine/France/29-170184/2017 | 2017-07-18 | H1 <sub>hu</sub> N2 | 1B.1.2.3            | MT378859 | MT378860 | MT378861 | MT378862 | MT378863 | MT378864 | MT378865 | MT378866 | This study |
| A/swine/France/29-170198/2017 | 2017-07-26 | H1 <sub>hu</sub> N2 | 1B.1.2.3            | MT378875 | MT378876 | MT378877 | MT378878 | MT378879 | MT378880 | MT378881 | MT378882 | This study |
| A/swine/France/29-170197/2017 | 2017-08-02 | H1 <sub>av</sub> N1 | 1C.2.1              | MT378867 | MT378868 | MT378869 | MT378870 | MT378871 | MT378872 | MT378873 | MT378874 | This study |
| A/swine/France/22-170192/2017 | 2017-08-09 | H1 <sub>av</sub> N1 | 1C.2.1 (A)          | MT378683 | MT378684 | MT378685 | MT378686 | MT378687 | MT378688 | MT378689 | MT378690 | This study |
| A/swine/France/56-170226/2017 | 2017-08-30 | H1 <sub>av</sub> N1 | 1C.2.1              | MT379139 | MT379140 | MT379141 | MT379142 | MT379143 | MT379144 | MT379145 | MT379146 | This study |
| A/swine/France/35-170233/2017 | 2017-09-11 | H1 <sub>av</sub> N1 | 1C.2.1 (A)          | MT378955 | MT378956 | MT378957 | MT378958 | MT378959 | MT378960 | MT378961 | MT378962 | This study |
| A/swine/France/59-170241/2017 | 2017-09-15 | H1 <sub>av</sub> N1 | 1C.2.1 (C)          | MT379243 | MT379244 | MT379245 | MT379246 | MT379247 | MT379248 | MT379249 | MT379250 | This study |
| A/swine/France/35-170242/2017 | 2017-09-27 | H1 <sub>hu</sub> N2 | 1B.1.2.3 (Δ146-147) | MT378963 | MT378964 | MT378965 | MT378966 | MT378967 | MT378968 | MT378969 | MT378970 | This study |
| A/swine/France/56-170294/2017 | 2017-11-13 | H1 <sub>av</sub> N1 | 1C.2.1              | MT379147 | MT379148 | MT379149 | MT379150 | MT379151 | MT379152 | MT379153 | MT379154 | This study |
| A/swine/France/22-170307/2017 | 2017-11-20 | H1 <sub>av</sub> N1 | 1C.2.1              | MT378691 | MT378692 | MT378693 | MT378694 | MT378695 | MT378696 | MT378697 | MT378698 | This study |
| A/swine/France/29-170306/2017 | 2017-11-21 | H1 <sub>av</sub> N1 | 1C.2.1 (A)          | MT378883 | MT378884 | MT378885 | MT378886 | MT378887 | MT378888 | MT378889 | MT378890 | This study |
| A/swine/France/50-170323/2017 | 2017-11-23 | H1 <sub>av</sub> N1 | 1C.2.1 (A)          | MT379067 | MT379068 | MT379069 | MT379070 | MT379071 | MT379072 | MT379073 | MT379074 | This study |
| A/swine/France/22-170335/2017 | 2017-12-14 | H1 <sub>hu</sub> N2 | 1B.1.2.3            | MT378699 | MT378700 | MT378701 | MT378702 | MT378703 | MT378704 | MT378705 | MT378706 | This study |
| A/swine/France/59-170345/2018 | 2017-12-19 | H1 <sub>av</sub> N1 | 1C.2.1 (C)          | MT379251 | MT379252 | MT379253 | MT379254 | MT379255 | MT379256 | MT379257 | MT379258 | This study |
| A/swine/France/50-170342/2017 | 2017-12-20 | H1 <sub>hu</sub> N2 | 1B.1.2.3 (Δ146-147) | MT379075 | MT379076 | MT379077 | MT379078 | MT379079 | MT379080 | MT379081 | MT379082 | This study |

|                               |            |                     |                     |          |          |          |          |          |          |          |          |            |
|-------------------------------|------------|---------------------|---------------------|----------|----------|----------|----------|----------|----------|----------|----------|------------|
| A/swine/France/22-180018/2018 | 2018-01-02 | H1 <sub>av</sub> N1 | 1C.2.1              | MT378723 | MT378724 | MT378725 | MT378726 | MT378727 | MT378728 | MT378729 | MT378730 | This study |
| A/swine/France/22-180008/2018 | 2018-01-03 | H1 <sub>av</sub> N1 | 1C.2.1              | MT378707 | MT378708 | MT378709 | MT378710 | MT378711 | MT378712 | MT378713 | MT378714 | This study |
| A/swine/France/22-180017/2018 | 2018-01-11 | H1 <sub>av</sub> N1 | 1C.2.1 (A)          | MT378715 | MT378716 | MT378717 | MT378718 | MT378719 | MT378720 | MT378721 | MT378722 | This study |
| A/swine/France/29-180023/2018 | 2018-01-12 | H1 <sub>hu</sub> N2 | 1B.1.2.3 **         | MT378899 | MT378900 | MT378901 | MT378902 | MT378903 | MT378904 | MT378905 | MT378906 | This study |
| A/swine/France/01-180027/2018 | 2018-01-17 | H1 <sub>av</sub> N1 | 1C.2.1 (B)          | MT378587 | MT378588 | MT378589 | MT378590 | MT378591 | MT378592 | MT378593 | MT378594 | This study |
| A/swine/France/29-180035/2018 | 2018-01-24 | H1 <sub>av</sub> N1 | 1C.2.1 (A)          | MT378907 | MT378908 | MT378909 | MT378910 | MT378911 | MT378912 | MT378913 | MT378914 | This study |
| A/swine/France/72-180053/2018 | 2018-01-29 | H1 <sub>av</sub> N1 | 1C.2.1 (A)          | MT379371 | MT379372 | MT379373 | MT379374 | MT379375 | MT379376 | MT379377 | MT379378 | This study |
| A/swine/France/22-180048/2018 | 2018-01-29 | H1 <sub>hu</sub> N2 | 1B.1.2.3            | MT378731 | MT378732 | MT378733 | MT378734 | MT378735 | MT378736 | MT378737 | MT378738 | This study |
| A/swine/France/59-180117/2018 | 2018-02-13 | H1 <sub>av</sub> N1 | 1C.2.1 (C)          | MT379259 | MT379260 | MT379261 | MT379262 | MT379263 | MT379264 | MT379265 | MT379266 | This study |
| A/swine/France/29-180124/2018 | 2018-02-26 | H1 <sub>hu</sub> N2 | 1B.1.2.3 (Δ146-147) | MT378915 | MT378916 | MT378917 | MT378918 | MT378919 | MT378920 | MT378921 | MT378922 | This study |
| A/swine/France/29-180140/2018 | 2018-03-13 | H1 <sub>hu</sub> N2 | 1B.1.2.3            | MT378995 | MT378996 | MT378997 | MT378998 | MT378999 | MT379000 | MT379001 | MT379002 | This study |
| A/swine/France/22-180175/2018 | 2018-03-23 | H1 <sub>hu</sub> N2 | 1B.1.2.3            | MT378739 | MT378740 | MT378741 | MT378742 | MT378743 | MT378744 | MT378745 | MT378746 | This study |
| A/swine/France/29-180202/2018 | 2018-04-08 | H1 <sub>av</sub> N1 | 1C.2.1              | MT378923 | MT378924 | MT378925 | MT378926 | MT378927 | MT378928 | MT378929 | MT378930 | This study |
| A/swine/France/01-180255/2018 | 2018-05-02 | H1 <sub>av</sub> N1 | 1C.2.1 (B)          | MT378611 | MT378612 | MT378613 | MT378614 | MT378615 | MT378616 | MT378617 | MT378618 | This study |
| A/swine/France/22-180254/2018 | 2018-05-14 | H1 <sub>hu</sub> N2 | 1B.1.2.3            | MT378747 | MT378748 | MT378749 | MT378750 | MT378751 | MT378752 | MT378753 | MT378754 | This study |
| A/swine/France/01-180274/2018 | 2018-05-16 | H1 <sub>av</sub> N1 | 1C.2.1 (B)          | MT378619 | MT378620 | MT378621 | MT378622 | MT378623 | MT378624 | MT378625 | MT378626 | This study |
| A/swine/France/22-180287/2018 | 2018-06-06 | H1 <sub>hu</sub> N2 | 1B.1.2.3            | MT378755 | MT378756 | MT378757 | MT378758 | MT378759 | MT378760 | MT378761 | MT378762 | This study |
| A/swine/France/35-180318/2018 | 2018-06-18 | H1 <sub>av</sub> N1 | 1C.2.1              | MT378971 | MT378972 | MT378973 | MT378974 | MT378975 | MT378976 | MT378977 | MT378978 | This study |
| A/swine/France/22-180323/2018 | 2018-06-28 | H1 <sub>av</sub> N1 | 1C.2.1              | MT378763 | MT378764 | MT378765 | MT378766 | MT378767 | MT378768 | MT378769 | MT378770 | This study |
| A/swine/France/59-180334/2018 | 2018-07-10 | H1 <sub>av</sub> N1 | 1C.2.1 (C)          | MT379283 | MT379284 | MT379285 | MT379286 | MT379287 | MT379288 | MT379289 | MT379290 | This study |
| A/swine/France/59-180359/2018 | 2018-08-10 | H1 <sub>av</sub> N1 | 1C.2.1 (C)          | MT379267 | MT379268 | MT379269 | MT379270 | MT379271 | MT379272 | MT379273 | MT379274 | This study |
| A/swine/France/56-180360/2018 | 2018-08-13 | H1 <sub>av</sub> N1 | 1C.2.1              | MT379155 | MT379156 | MT379157 | MT379158 | MT379159 | MT379160 | MT379161 | MT379162 | This study |
| A/swine/France/12-180371/2018 | 2018-09-03 | H1 <sub>av</sub> N1 | 1C.2.1 (A)          | MT378635 | MT378636 | MT378637 | MT378638 | MT378639 | MT378640 | MT378641 | MT378642 | This study |
| A/swine/France/56-180406/2018 | 2018-10-01 | H1 <sub>hu</sub> N2 | 1B.1.2.3            | MT379163 | MT379164 | MT379165 | MT379166 | MT379167 | MT379168 | MT379169 | MT379170 | This study |
| A/swine/France/49-180429/2018 | 2018-10-15 | H1 <sub>av</sub> N1 | 1C.2.1 (A)          | MT379027 | MT379028 | MT379029 | MT379030 | MT379031 | MT379032 | MT379033 | MT379034 | This study |
| A/swine/France/56-180424/2018 | 2018-10-23 | H1 <sub>av</sub> N2 | 1C.2                | MT379171 | MT379172 | MT379173 | MT379174 | MT379175 | MT379176 | MT379177 | MT379178 | This study |
| A/swine/France/35-180443/2018 | 2018-10-26 | H1 <sub>hu</sub> N2 | 1B.1.2.3 (Δ146-147) | MT378979 | MT378980 | MT378981 | MT378982 | MT378983 | MT378984 | MT378985 | MT378986 | This study |
| A/swine/France/72-180446/2018 | 2018-10-29 | H1 <sub>av</sub> N1 | 1C.2.1 (A)          | MT379379 | MT379380 | MT379381 | MT379382 | MT379383 | MT379384 | MT379385 | MT379386 | This study |
| A/swine/France/22-180459/2018 | 2018-11-09 | H1 <sub>hu</sub> N2 | 1B.1.2.3            | MT378771 | MT378772 | MT378773 | MT378774 | MT378775 | MT378776 | MT378777 | MT378778 | This study |
| A/swine/France/53-180462/2018 | 2018-11-12 | H1 <sub>av</sub> N1 | 1C.2.1 (A)          | MT379099 | MT379100 | MT379101 | MT379102 | MT379103 | MT379104 | MT379105 | MT379106 | This study |
| A/swine/France/59-180465/2018 | 2018-11-13 | H1 <sub>av</sub> N1 | 1C.2.1 (C)          | MT379275 | MT379276 | MT379277 | MT379278 | MT379279 | MT379280 | MT379281 | MT379282 | This study |
| A/swine/France/12-180474/2018 | 2018-11-14 | H1 <sub>av</sub> N1 | 1C.2.1 (A)          | MT378643 | MT378644 | MT378645 | MT378646 | MT378647 | MT378648 | MT378649 | MT378650 | This study |
| A/swine/France/56-180472/2018 | 2018-11-16 | H1 <sub>av</sub> N1 | 1C.2.1 (A)          | MT379187 | MT379188 | MT379189 | MT379190 | MT379191 | MT379192 | MT379193 | MT379194 | This study |
| A/swine/france/56-180470/2018 | 2018-11-22 | H1 <sub>hu</sub> N2 | 1B.1.2.3            | MT379179 | MT379180 | MT379181 | MT379182 | MT379183 | MT379184 | MT379185 | MT379186 | This study |

|                               |            |                     |            |          |          |          |          |          |          |          |          |            |
|-------------------------------|------------|---------------------|------------|----------|----------|----------|----------|----------|----------|----------|----------|------------|
| A/swine/France/16-180487/2018 | 2018-11-27 | H1 <sub>av</sub> N1 | 1C.2.1 (A) | MT378651 | MT378652 | MT378653 | MT378654 | MT378655 | MT378656 | MT378657 | MT378658 | This study |
| A/swine/France/44-180495/2018 | 2018-11-29 | H1 <sub>av</sub> N1 | 1C.2.1 (A) | MT379019 | MT379020 | MT379021 | MT379022 | MT379023 | MT379024 | MT379025 | MT379026 | This study |
| A/swine/France/35-190039/2018 | 2018-12-11 | H1 <sub>av</sub> N2 | 1C.2.1 (A) | MT378987 | MT378988 | MT378989 | MT378990 | MT378991 | MT378992 | MT378993 | MT378994 | This study |
| A/swine/France/86-180497/2018 | 2018-12-13 | H1 <sub>av</sub> N1 | 1C.2.1 (A) | MT379403 | MT379404 | MT379405 | MT379406 | MT379407 | MT379408 | MT379409 | MT379410 | This study |

The asterisks indicates strains from clade HA-1B.1.2.3 harboring one (\*) or two (\*\*) amino acid deletions in position 146-147 in HA sequence but which did not clustered with strains of 1B.1.2.3 ( $\Delta$ 146-147) group.

## References :

- Chastagner A, Bonin E, Fablet C, Quéguiner S, Hirschaud E, Lucas P, Gorin S, Barbier N, Béven V, Garin E, Blanchard Y, Rose N, Hervé S, Simon G. 2019. Virus persistence in pig herds led to successive reassortment events between swine and human influenza A viruses, resulting in the emergence of a novel triple-reassortant swine influenza virus. *Veterinary Research* 50:77.
- Dunham EJ, Dugan VG, Kaser EK, Perkins SE, Brown IH, Holmes EC, Taubenberger JK. 2009. Different evolutionary trajectories of European avian-like and classical swine H1N1 influenza A viruses. *Journal of Virology* 83:5485-94.
- Franck N, Queguiner S, Gorin S, Eveno E, Fablet C, Madec F, Kuntz-Simon G. Molecular epidemiology of swine influenza virus in France: identifications of novel H1N1 reassortants, p 250. In (ed),
- Krumbholz A, Lange J, Sauerbrei A, Groth M, Platzer M, Kanrai P, Pleschka S, Scholtissek C, Buttner M, Durrwald R, Zell R. 2014. Origin of the European avian-like swine influenza viruses. *Journal of General Virology* 95:2372-6.
- Lycett SJ, Baillie G, Coulter E, Bhatt S, Kellam P, McCauley JW, Wood JL, Brown IH, Pybus OG, Leigh Brown AJ, Combating Swine Influenza Initiative CC. 2012. Estimating reassortment rates in co-circulating Eurasian swine influenza viruses. *J Gen Virol* 93:2326-36.
- Marozin S, Gregory V, Cameron K, Bennett M, Valette M, Aymard M, Foni E, Barigazzi G, Lin Y, Hay A. 2002. Antigenic and genetic diversity among swine influenza A H1N1 and H1N2 viruses in Europe. *Journal of General Virology* 83:735-745.
- Watson SJ, Langat P, Reid SM, Lam TT-Y, Cotten M, Kelly M, Van Reeth K, Qiu Y, Simon G, Bonin E, Foni E, Chiapponi C, Larsen L, Hjulsager C, Markowska-Daniel I, Urbaniak K, Dürwald R, Schlegel M, Huovilainen A, Davidson I, Dán Á, Loeffen W, Edwards S, Bublot M, Vila T, Maldonado J, Valls L, Consortium E, Brown IH, Pybus OG, Kellam P. 2015. Molecular Epidemiology and Evolution of Influenza Viruses Circulating within European Swine between 2009 and 2013. *Journal of Virology* 89:9920-9931.
