# Supplementary material for: Genetic and Antigenic Evolution of European Swine Influenza A Viruses of HA-1C (Avian-Like) and HA-1B (Human-Like) Lineages in France from 2000 to 2018
Source: MDPI journal article supplement (doi:10.3390/v12111304), 2020-11-13
Supplement: s1 [file s1]

**Table S4. Specific mutation patterns identified with AVANA software which characterize deduced amino acid sequences of internal proteins from strains of the three genogroups A, B and C within HA-1C.2.1 clade**

*Mutual Information* measures the dependence between two variables, i.e. the relationship between the amino acid residues observed at a site and the set of sequences in which they are observed, knowing their occurrence frequency in the other set of sequences.

\* indicates virulence markers described in the literature, and the rows are colored in green or in red when the exact mutation has been proven to decrease or increase virulence, respectively.

**(A) Specific mutation patterns in internal proteins of strains from HA-1C.2.1 clade group A**

| Amino acid (aa) position | Major aa (frequency) within HA-1C.2.1 strains of group A (n = 28) | Major aa (frequency) within HA-1C strains exclude group A (n = 67) | Mutual Information |
|--------------------------|-------------------------------------------------------------------|--------------------------------------------------------------------|--------------------|
| PB1-F2-35                | S (0.893)                                                         | L (0.841)                                                          | 0.442              |
| PB1-F2-37                | L (0.821)                                                         | RQ (0.826)                                                         | 0.571              |
| PB1-F2-42                | S (0.786)                                                         | Y (0.58)                                                           | 0.522              |
| PB1-F2-65                | K (0.893)                                                         | R (0.812)                                                          | 0.408              |
| PB1-F2-87*               | G (0.857)                                                         | E (0.87)                                                           | 0.430              |
| PA-388                   | N (0.857)                                                         | SG (0.913)                                                         | 0.518              |
| M2-88                    | N (0.714)                                                         | D (0.971)                                                          | 0.521              |
| NS1-66                   | ND (0.964)                                                        | K (0.725)                                                          | 0.492              |
| NS1-76                   | E (0.929)                                                         | A (0.841)                                                          | 0.717              |
| NS1-86                   | V (0.964)                                                         | A (0.797)                                                          | 0.578              |

**(B) Specific mutation patterns in internal proteins of strains from HA-1C.2.1 clade group B**

| Amino acid (aa) position | Major aa (frequency) within HA-1C.2.1 strains of group B (n = 8) | Major aa (frequency) within HA-1C strains exclude group B (n = 96) | Mutual Information |
|--------------------------|------------------------------------------------------------------|--------------------------------------------------------------------|--------------------|
| PB2-73                   | K (1)                                                            | Q (1)                                                              | 1                  |
| PB2-82                   | T (1)                                                            | NS (1)                                                             | 1                  |
| PB2-463                  | V (1)                                                            | I (0.989)                                                          | 0.984              |
| PB2-575                  | V (0.875)                                                        | MI (0.978)                                                         | 0.691              |
| PB1-364                  | I (0.875)                                                        | L (0.966)                                                          | 0.639              |
| PB1-619                  | N (1)                                                            | D (1)                                                              | 1                  |
| PB1-F2-6                 | G (1)                                                            | D (0.966)                                                          | 0.920              |
| PB1-F2-29                | R (1)                                                            | K (0.989)                                                          | 0.975              |
| PB1-F2-33                | P (1)                                                            | L (0.876)                                                          | 0.833              |
| PB1-F2-37                | Q (1)                                                            | RL (0.82)                                                          | 0.771              |
| PB1-F2-42                | C (1)                                                            | YSF (0.989)                                                        | 0.982              |
| PB1-F2-46                | T (0.875)                                                        | M (1)                                                              | 0.717              |
| PB1-F2-55                | I (0.875)                                                        | T (0.888)                                                          | 0.516              |
| PB1-F2-57                | F (1)                                                            | SY (0.978)                                                         | 0.958              |
| PB1-F2-66*               | S (1)                                                            | N (0.978)                                                          | 0.975              |
| PA-66                    | G (1)                                                            | SN (0.978)                                                         | 0.952              |
| PA-204                   | K (1)                                                            | R (0.978)                                                          | 0.952              |
| PA-296                   | N (0.875)                                                        | S (1)                                                              | 0.717              |
| PA-330                   | V (1)                                                            | I (0.966)                                                          | 0.958              |
| PA-615*                  | R (1)                                                            | K (0.876)                                                          | 0.767              |

|          |        |             |       |
|----------|--------|-------------|-------|
| PA-684   | E (1)  | G (0.966)   | 0.922 |
| PA-716   | R (1)  | K (0.932)   | 0.824 |
| PA-X-66  | G (1)  | SN (0.978)  | 0.952 |
| PA-X-204 | S (1)  | GD (0.978)  | 0.952 |
| PA-X-208 | K (1)  | R (0.933)   | 0.855 |
| NP-377   | I (1)  | V (0.798)   | 0.636 |
| NP-450   | N (1)  | S (0.933)   | 0.858 |
| NS1-24   | D (1)  | N (0.876)   | 0.802 |
| NS1-44   | K (1)  | R (0.899)   | 0.785 |
| NS1-48*  | I (1)  | SN (1)      | 1     |
| NS1-53   | K (1)  | E (1)       | 1     |
| NS1-62   | ND (1) | KR (0.978)  | 1     |
| NS1-79   | L (1)  | ITM (0.966) | 0.942 |
| NS1-92*  | E (1)  | D (0.978)   | 0.932 |
| NS1-171* | G (1)  | D (0.944)   | 0.909 |
| NS1-182  | V (1)  | I (0.966)   | 0.929 |
| NS1-202  | T (1)  | A (0.899)   | 0.826 |
| NS1-209  | D (1)  | NK (0.989)  | 0.977 |
| NS1-214  | L (1)  | FY (0.944)  | 0.859 |
| NS1-216  | T (1)  | PS (0.966)  | 0.930 |
| NEP-14   | V (1)  | MT (0.944)  | 0.909 |

**(C) Specific mutation patterns in internal proteins of strains from HA-1C.2.1 clade group C**

| Amino acid (aa)<br>position | Major aa (frequency)<br>within HA-1C.2.1 strains of<br>group C (n = 9) | Major aa (frequency) within<br>HA-1C strains exclude<br>group C (n = 95) | Mutual<br>Information |
|-----------------------------|------------------------------------------------------------------------|--------------------------------------------------------------------------|-----------------------|
| PB2-292                     | M (0.889)                                                              | I (0.75)                                                                 | 0.542                 |
| PB2-353                     | R (0.889)                                                              | K (1)                                                                    | 0.739                 |
| PB2-507                     | P (0.889)                                                              | Q (1)                                                                    | 0.739                 |
| PB2-718                     | R (0.889)                                                              | K (0.955)                                                                | 0.649                 |
| PB1-52                      | K (0.889)                                                              | R (0.989)                                                                | 0.718                 |
| PB1-257                     | A (0.889)                                                              | T (0.943)                                                                | 0.638                 |
| PB1-264                     | DN (0.889)                                                             | E (1)                                                                    | 0.739                 |
| PB1-386                     | K (1)                                                                  | R (0.977)                                                                | 0.940                 |
| PB1-584                     | Q (0.889)                                                              | H (0.977)                                                                | 0.741                 |
| PB1-654*                    | N (0.889)                                                              | S (0.977)                                                                | 0.688                 |
| PB1-F2-8                    | L (0.778)                                                              | P (0.909)                                                                | 0.465                 |
| PB1-F2-11                   | Q (0.889)                                                              | R (0.92)                                                                 | 0.606                 |
| PB1-F2-16                   | T (1)                                                                  | I (0.966)                                                                | 0.917                 |
| PB1-F2-21                   | K (0.889)                                                              | E (0.898)                                                                | 0.907                 |
| PB1-F2-59                   | K (0.889)                                                              | R (0.955)                                                                | 0.650                 |
| PB1-F2-63                   | F (0.889)                                                              | S (0.955)                                                                | 0.653                 |
| PB1-F2-73                   | R (0.889)                                                              | K (1)                                                                    | 0.739                 |
| PA-13                       | V (0.889)                                                              | I (0.977)                                                                | 0.684                 |
| PA-343*                     | A (1)                                                                  | T (0.852)                                                                | 0.772                 |
| PA-400                      | VNS (1)                                                                | I (0.875)                                                                | 0.900                 |
| PA-X-13                     | V (0.889)                                                              | I (0.977)                                                                | 0.684                 |
| PA-X-618                    | K (1)                                                                  | Q (1)                                                                    | 1                     |
| PA-X-624                    | I (1)                                                                  | V (0.943)                                                                | 0.900                 |

|          |            |            |       |
|----------|------------|------------|-------|
| PA-X-638 | I (1)      | V (0.807)  | 0.643 |
| M2-14    | E (0.778)  | G (0.92)   | 0.431 |
| NS1-18   | V (0.889)  | I (0.966)  | 0.647 |
| NS1-214  | Y (0.667)  | F (0.875)  | 0.619 |
| NS1-217  | ER (0.889) | K (0.989)  | 0.725 |
| NEP-57   | TY (0.889) | SF (0.966) | 0.710 |
