# Supplementary material for: Genetic and Antigenic Evolution of European Swine Influenza A Viruses of HA-1C (Avian-Like) and HA-1B (Human-Like) Lineages in France from 2000 to 2018
Source: MDPI journal article supplement (doi:10.3390/v12111304), 2020-11-13

Figure 1. Genogroups identified by hierarchical clustering analysis among M-gene sequences from human and swine IAVs from North hemisphere

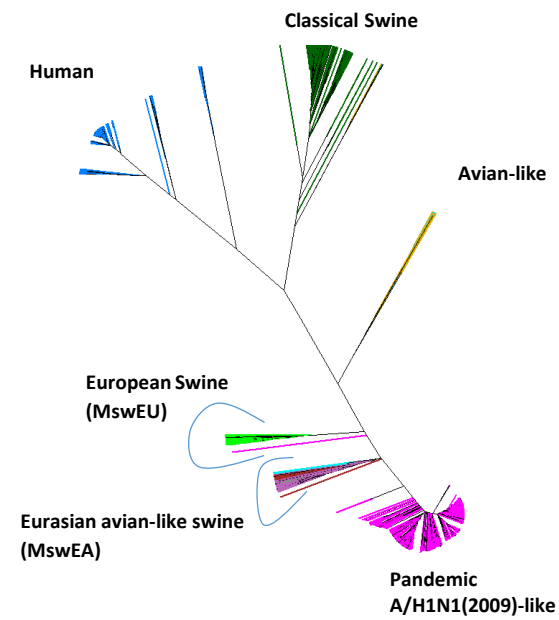

Table 1. Distribution of M sequences within the so called ‘Eurasian avian-like swine’ lineage grouping the subgroups ‘MswEU’, ‘MswEA’ and ‘Avian-like’, per host/continent and IAV subtypes

|            |                                 | Swine<br>North America | Swine<br>Asia | Swine<br>Europe | Human<br>Europe | H1N1 | H1N2 | H3N2 | H5N1 | H9N2 | Other |
|------------|---------------------------------|------------------------|---------------|-----------------|-----------------|------|------|------|------|------|-------|
| MswEU      |                                 | 0                      | 0             | 248             | 2               | 110  | 76   | 60   | 0    | 0    | 4     |
| MswEA      | ‘Ancestral’ <2009               | 1                      | 21            | 103             | 0               | 68   | 25   | 30   | 0    | 0    | 2     |
|            | Danish H1 <sub>av</sub> N2-like | 0                      | 3             | 21              | 0               | 6    | 15   | 0    | 0    | 1    | 2     |
|            | ‘Recent’ >2000                  | 0                      | 205           | 102             | 0               | 247  | 40   | 18   | 0    | 0    | 2     |
| Avian-like |                                 | 5                      | 51            | 1               | 3               | 2    | 1    | 1    | 20   | 17   | 19    |

Figure 2. Distribution of M sequences from MswEA and MswEU per IAV subtypes from 1996 to 2016

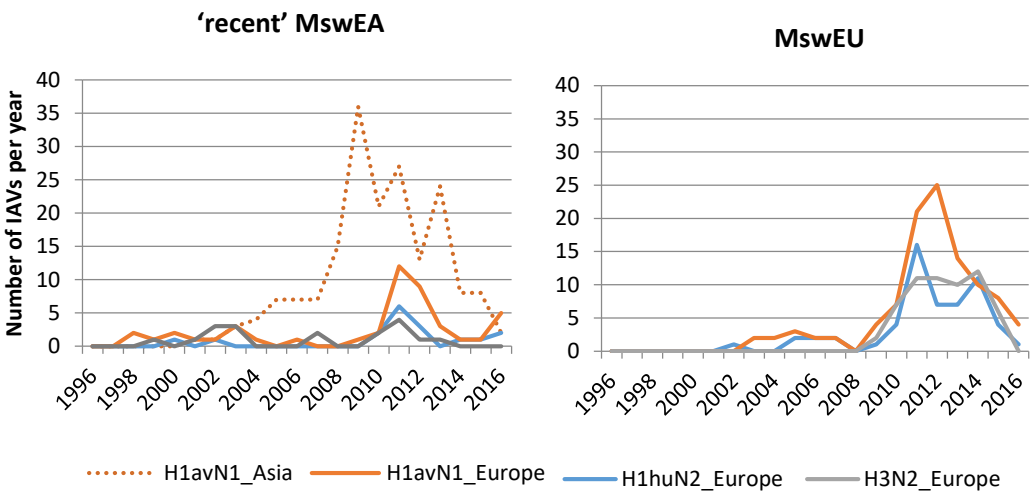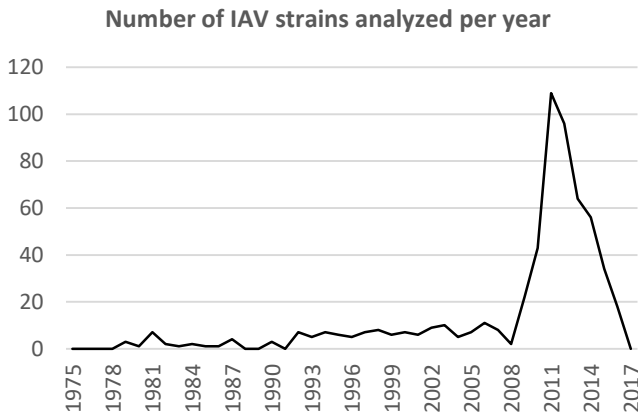

**Figure 3. Distribution of M genogroup associated to H1avNy and H1huNy strains isolated from pigs in France between 2000 and 2018**

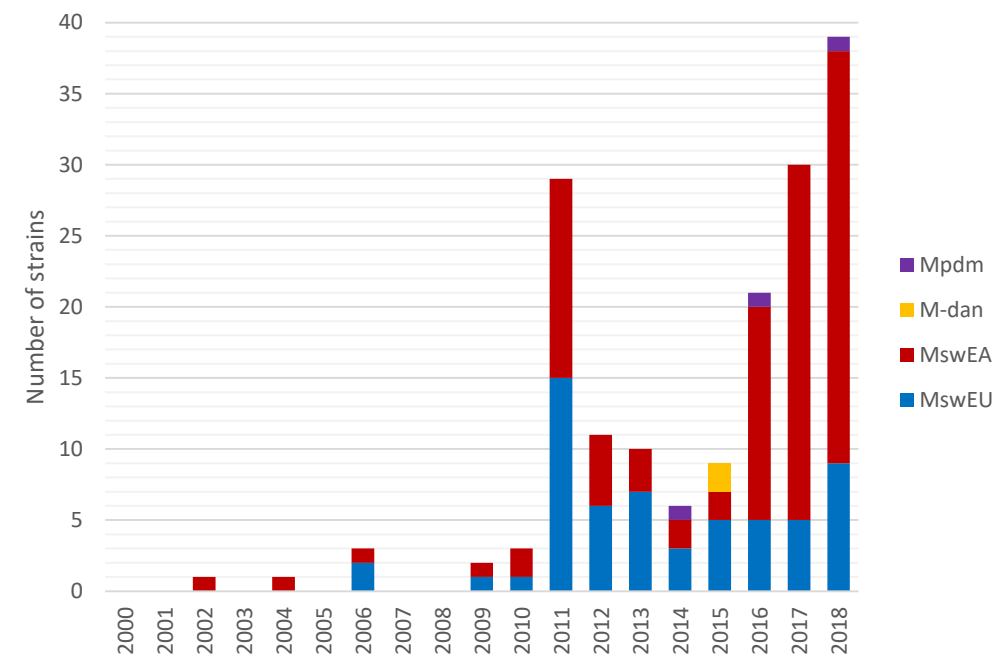

Supplement: s1 [file s1]
