# Supplementary material for: Genetic and Antigenic Evolution of European Swine Influenza A Viruses of HA-1C (Avian-Like) and HA-1B (Human-Like) Lineages in France from 2000 to 2018
Source: Viruses. 2020 Nov 13;12(11):1304. doi: 10.3390/v12111304 (PMC7697621; doi:10.3390/v12111304)
Supplement: Supplementary file 1 [file viruses-12-01304-s001.zip]

Archive with 5 entries (5 files):
- Supp Fig S1_Detailled_M-gene.pdf
- Table_S1_Genbank_acc_numbers.pdf
- Table_S2_Residues_involve_patho_virulence_fitness_Vf.pdf
- Table_S3_Compementary_HI_titer_Vf.xlsx
- Table_S4_Specific_mutation_pattern_Vf.pdf
