# Supplementary material for: Genetic and Antigenic Evolution of European Swine Influenza A Viruses of HA-1C (Avian-Like) and HA-1B (Human-Like) Lineages in France from 2000 to 2018
Source: Viruses. 2020 Nov 13;12(11):1304. doi: 10.3390/v12111304 (PMC7697621; doi:10.3390/v12111304)
Supplement: Supplementary file 1 [file viruses-12-01304-s001.zip › Table_S3_Compementary_HI_titer_Vf.xlsx]

## Sheet: HI titers result
SUPPLEMENTARY MATERIAL: TABLE S3
A. HI titers of hyperimmune antisera directed against reference H1av, H1hu, H1pdm and classical swine H1 viruses when tested to swIAV of H1avNy lineage isolated in France between 2000-2018
The first part of the table reports the homologous HI titers for reference antigen. The second part reports the geometric mean HI titers +/- the standard deviation (in bold) obtained by strains grouping in the different clades over time then the detailed titers for subgroups within the HA-1C.2.1 clade over time. The range of HI antibody titers obtained within each group of tested strains is repor…
		HA clade	1C.1	1C.2.1	1C.2.1	1C.2.1	1C.2	1A.1-like	1A.3.3.2	1A.3.3.2	1B.1
subtype	HA clade	swIAV strains (name or period of isolation or subgroup within 1C.2.1 clade of tested strains)	A/Sw/Finistere/2899/82 (H1avN1)	A/Sw/Morbihan/0070/05 (H1avN1)	A/Sw/Cotes d'Armor/0388/09 (H1avN1)	A/Sw/Cotes d'Armor/0186/10 (H1avN2)	A/Sw/France/65-150242/15 (H1avN2)	A/Sw/England/117316/86 (H1N1)	A/California/04/09 (H1N1pdm)	A/Sw/Sarthe/0255/10 (H1N1pdm)	A/Sw/Scotland/410440/94 (H1huN2)
H1N1	1A.1-like	A/sw/England/117316/86		160	160			1280	20	80	10
H1N1pdm	1A.3.3.2	A/California/04/09		80	40			160	640	640	20
		A/Sw/Sarthe/0255/10			10			80	160	320	10
H1huN2	1B.1	Sw/Scotland/410440/94	10	10	10			20	10	20	2560
H1avN1	1C.1	A/Sw/Finistere/2899/82	2560	80							<10
	1C.2.1	A/Sw/Morbihan/0070/05	40	640							<10
		A/Sw/Cotes d'Armor/0388/09		320	640			160	<10	<10	<10
H1avN2	1C.2.1	Sw/Cotes d'Armor/0186/10		320	320	320		40	<10		<10
	1C.2	A/Sw/France/65-150242/15			80	<10	2560			<10	<10
H1avNy					[10-80]	[<10]	[40-2560]			[<10-80]	[<10]
	1C.2	2015-2018			40 ± 3.32		320 ± 18.93			4,31 ± 12,55
					3	3	2			3	3
					[80-320]	[80-160]				[<10-10]	[<10]
	1C.2.2	2013-2015			160 ± 2,67	113,14 ± 1,63				3,16 ± 5,09
					2	2				2	2
			[40-640]	[160-1280]	[320-1280]			[20-160]	[<10-10]		[<10-10]
		<2011	215.34 ± 2.85	490.23 ± 1.62	525.01 ± 1.69			48,76 ± 2,16	1,93 ± 3,08		1,43 ± 2,33
			16	26	7			7	7	1	26
				[320-1280]	[320-2560]	[<10-640]		[<10-320]	[<10-40]	[<10-80]	[<10-20]
	1C.2.1	2011-2014		750.18 ± 1.58	879.33 ± 1.83	242.51 ± 1.81		82,77 ± 3,26	2,21 ± 3,35	5,55 ± 6,17	2,27 ± 3,47
				48	48	30		48	48	32	48
					[40-1280]	[80-320]	[<10-80]			[<10-160]	[<10-40]
		2015-2018			336.99 ± 1.96	132.81 ± 1.71	16.59 ± 3.17			5,02 ± 5,45	1,78 ± 3,01
					58	58	36			66	67
					[160-1280]	[80-320]	[10-80]			[<10-40]	[<10-10]
		group A			427.15 ± 1.84	146.72 ± 1.8	30.07 ± 1.74			3,02 ± 3,93	1,62 ± 2,6
					22	22	15			24	24
					[160-320]	[80-160]	[<10-20]			[<10-160]	[<10-10]
	subgroups within	group B			246.75 ± 1.43	113.14 ± 1.45	9.56 ± 3.66			5,32 ± 7,04	1,78 ± 2,9
	1C.2.1				6	6	4			8	8
	2015-2018				[320-640]	[80-320]	[20-40]			[<10-160]	[<10-20]
		group C			470.32 ± 1.44	201.59 ± 1.63	26.92 ± 1.45			10,83 ± 6,89	3,25 ± 4,13
					8	8	6			9	9
					[40-1280]	[<10-320]	[<10-40]			[<10-160]	[<10-40]
		Others (not A, B or C)			265.52 ± 2.17	110.16 ± 1.57	7.7 ± 4.11			6,05 ± 5,27	1,59 ± 3,06
					22	22	11			25	26
B. HI titers of hyperimmune antisera directed against reference H1hu, H1av, H1pdm and classical swine H1 viruses when tested to swIAV of H1huNy lineage isolated in France between 2000-2018
The first part of the table reports the homologous HI titers for reference antigen. The second part reports the geometric mean HI titers +/- the standard deviation (in bold) obtained by strains grouping in the different clades over time then the detailed titers for subgroups within the HA-1B.1.2.3 clade over time. The range of HI antibody titers obtained within each group of tested strains is rep…
		clade	1B.1	1B.1.2.3	1B.1.1	1B.1.2.3-D	1B.1.2.3 D146-147	1B.1.2.3 D147	1C.2.1	1C.2.1	1A.1-like	1A.3.3.2
subtype	clade	reference strains	A/Sw/Scotland/410440/94 (H1huN2)	A/Sw/Cotes d'Armor/0070/10 (H1huN1)	A/Sw/Cotes d'Armor/0214/06 (H1huN2)	A/Sw/Cotes d'Armor/0113/06 (H1huN2)	A/Sw/France/22-130212/13 (H1huN2v)	A/Sw/Cotes d'Armor/0190/06 (H1huN1)	A/Sw/Morbihan/0070/05 (H1avN1)	A/Sw/Cotes d'Armor/0388/09 (H1avN1)	A/Sw/England/117316/86 (H1N1)	A/Sw/Sarthe/0255/10 (H1N1pdm)
H1N1	1A.1-like	A/sw/England/117316/86	10			<10			160	160	1280	80
H1N1pdm	1A.3.3.2	A/Sw/Sarthe/0255/10	10			<10				10	80	320
H1avN1	1C.2.1	A/Sw/Morbihan/0070/05	<10		10	10		<10	640
		A/Sw/Cotes d'Armor/0388/09	<10			<10			320	640	160	<10
H1huN2	1B.1	A/Sw/Scotland/410440/94	2560		320	160		10	10	10	20	20
H1huN1	1B.1.2.3	A/Sw/Cotes d'Armor/0070/10	1280	640					20
H1huN2	1B.1.1	A/Sw/Cotes d’Armor/0214/06	320		1280	160		10	20
H1huN2	1B.1.2.3-D	A/Sw/Cotes d’Armor/0113/06	1280		320	1280		20	10	20	40	40
H1huN2	1B.1.2.3 D146-147	A/Sw/France/22-130212/13	160	320	320	40	1280	160	10	10	10	<10
H1huN1	1B.1.2.3 D147	A/Sw/Cotes d’Armor/0190/06	40	20	10	<10		1280	<10	<10	<10	<10
H1huNy			[80-1280]		[320-1280]	[40-160]		[<10-20]	[<10-80]
	1B.1.1	<2011	320 ± 2.4		640 ± 1.63	100.79 ± 1.76		4.57 ± 4.12	13,63 ± 4,26
			6		5	6		5	6
			[640-2560]	[320-640]	[80-640]	[160-1280]		[10-80]	[<10-320]	[10-320]	[40-40]	[40-40]
		<2011	1539.87 ± 1.63	452.55 ± 1.63	359.19 ± 1.92	525.01 ± 1.88		40 ± 2.06	9,56 ± 4,4	40 ± 6,26	40 ± 1	40 ± 1
			15	2	12	14		12	15	3	3	2
	1B.1.2.3		[40-5120]	[20-1280]	[<10-1280]	[<10-640]	[160-1280]	[<10-1280]	[<10-40]	[<10-40]	[<10-80]	[<10-80]
		2011-2014	510.37 ± 3.87	240.8 ± 3.38	187.44 ± 3.44	61.53 ± 6.27	320 ± 2	69.59 ± 3.88	5,08 ± 3,55	7,02 ± 3,59	6,87 ± 4,86	5,16 ± 4,81
			49	39	38	50	11	38	50	50	50	42
			[20-2560]	[20-1280]	[80-320]	[<10-320]	[40-640]	[40-320]		[<10-40]		[<10-40]
		2015-2018	499.65 ± 4.22	342.97 ± 3.27	160 ± 1.76	77.02 ± 4.81	201.59 ± 2.23	134.54 ± 2.39		4,44 ± 3,91		5,94 ± 4,25
			28	30	4	30	30	4		30		30
			[1280-2560]	[640-1280]		[160-320]	[80-160]			[10-10]		[40-40]
	1B.1.2.1	2015-2018	2031.87 ± 1.49	806.35 ± 1.49		253.98 ± 1.49	126.99 ± 1.49			12,6 ± 1,49		40 ± 1
			3	3		3	3			3		3
			[640-2560]		[80-640]	[160-1280]		[40-80]	[<10-40]
	Subgroups	All except groups	1741.81 ± 1.65		390.08 ± 2.16	452.55 ± 1.9		65.63 ± 1.4	7,55 ± 3,45
	within 1B.1.2.3	D & D146-147	9		7	8		7	9
	<2011		[640-2560]		[160-640]	[320-1280]		[10-40]	[<10-320]	[20-320]	[40-40]	[40-40]
		group D	1280 ± 1.55		320 ± 1.63	640 ± 1.86		20 ± 1.63	13,63 ± 6,4	80 ± 7,1	40 ± 1	40 ± 1
			6		5	6		5	6	2	2	2
			[640-5120]	[320-1280]	[160-1280]	[40-640]	[160-320]	[<10-160]	[<10-40]	[10-20]	[10-40]	[<10-80]
	Subgroups	All except groups	1612.7 ± 1.66	728.82 ± 1.68	452.55 ± 1.66	181.49 ± 1.94	190.27 ± 1.41	39.45 ± 3.07	9,7 ± 2,73	14,59 ± 1,42	21,3 ± 1,53	14,64 ± 3,19
	within 1B.1.2.3	D & D146-147	21	16	16	22	4	16	22	22	22	17
	2011-2014		[80-2560]	[20-640]	[<10-160]	[40-640]		[<10-10]	[<10-20]	[<10-40]	[<10-80]	[<10-40]
		group D	829.98 ± 2.84	160 ± 6.26	12.65 ± 36.19	226.27 ± 2.67		3.16 ± 5.09	3,76 ± 4,22	7,09 ± 5,37	15,91 ± 5,74	14,5 ± 4,64
			8	3	2	8		2	8	8	8	5
			[320-2560]	[160-1280]		[80-320]	[40-320]			[<10-20]		[<10-40]
		All except groups	1280 ± 1.79	685.94 ± 1.81		190.27 ± 1.72	144.2 ± 1.98			6,61 ± 3,75		12,9 ± 2,78
		D & D146-147	18	20		20	20			20		20
	Subgroups		[40-320]	[20-320]	[40-320]	[<10-40]	[160-1280]	[40-1280]	[<10-10]	[<10-20]	[<10-10]	[<10-20]
	within 1B.1.2.3	D146-147	125.53 ± 1.76	105.56 ± 2.21	121.26 ± 1.99	11.12 ± 5.17	430.69 ± 1.97	149.29 ± 2.1	2,82 ± 3,24	3,13 ± 3,72	1,41 ± 2,32	1,64 ± 2,79
	2015-2018		20	20	20	20	7	20	20	20	20	20
			[20-320]	[20-160]	[80-160]	[<10-40]	[160-640]	[160-320]		[<10-10]		[<10-10]
		D146-147	91.9 ± 2.2	85.74 ± 2.14	126.99 ± 1.49	12.62 ± 3.92	393.97 ± 1.77	201.59 ± 1.49		2 ± 3,04		1,26 ± 2,07
			10	10	3	10	10	3		10		10
